# Supplementary material
Source: Research Square preprint supplement (doi:10.21203/rs.3.rs-9284032/v1)
Supplement: Supplementary file 1 [file f48bb8651e0d5f88d3aa8da9.docx]

**Supplementary data**

**For Neuroprotective and antioxidant effects of digoxin derivative (BD-8) in an LPS-induced neuroinflammation model**

**Table of Contents**

1. **General Experimental Methods**
2. **Structural elucidation data**
3. **1H, 13C and DEPT-135 NMR spectra of BD-8**
4. **High resolution mass spectra of BD-8**
5. **ESI-MS of BD-8**

###

**1. General Experimental Methods**

All NMR data were acquired in CDCl3 on Bruker BioSpin Avance NEO 600 MHz  (UFMG-DQ). The spectrometer was equipped with a 5-mm multinuclear direct detection probe with z-gradient. All 1H- and 13C-NMR chemical shifts are given in ppm (*δ*) relative to the TMS signal at 0.00 ppm and the coupling constants (*J*) are in Hz. HPLC analysis was performed in a Shimadzu Prominence liquid chromatography system, equipped with a LC-20AT pump, SPD-M20A Photodiode Array detector, SIL-20A automatic injector, and a Shim-pack C-18 VP-ODS 4.6 × 250 mm, 5 μm reverse-phase column.

ESI-MS analysis were obtained using Amazon SL, Bruker Daltonics spectrometer (Central Analítica LCACCO-UFSJ), operated by direct infusion through an electrospray source in negative mode resulting in [M-H]- ions.

A HRMS analysis were obtained using anq-ToF Maxis 3G, Bruker Daltonics spectrometer (Central Analítica IQ-USP), operated by direct infusion through an electrospray source in both positive modesresulting in [M+H]+ and [M+Na]+ ions.

**2. Structural elucidation data**

**1H RMN** (600 MHz, CDCl3) δ (ppm): 7.29 (s, 1H), 7.24 (d, *J* = 8.3 Hz, 1H), 7.21 (d, *J* = 8.3 Hz, 1H), 6.84 – 6.79 (m, 2H), 6.69 – 6.61 (m, 4H), 4.90 (ddd, *J* = 9.8, 5.9, 2.2 Hz, 4H), 4.85 (dd, *J* = 9.6, 2.2 Hz, 2H), 4.24 (dq, *J* = 6.7, 3.3 Hz, 4H), 4.10 (q, *J* = 3.1 Hz, 4H), 4.02 (s, 2H), 3.97 (s, 1H), 3.95 – 3.88 (m, 3H), 3.83 (dd, *J* = 9.4, 6.3 Hz, 2H), 3.76 (ddd, *J* = 9.6, 6.4, 3.7 Hz, 4H), 3.59 – 3.54 (m, 1H), 3.38 (t, *J* = 8.7 Hz, 1H), 3.29 (dd, *J* = 9.5, 3.3 Hz, 1H), 3.24 (dd, *J* = 9.3, 3.0 Hz, 1H), 3.20 (dd, *J* = 9.4, 3.0 Hz, 1H), 3.09 (s, 2H), 3.03 (s, 2H), 2.19 – 2.02 (m, 11H), 1.99 – 1.90 (m, 2H), 1.86 – 1.41 (m, ~50H), 1.28 (d, *J* = 6.3 Hz, 6H), 1.23 (d, *J* = 6.2 Hz, 12H), 0.96 (t, *J* = 7.4 Hz, 6H), 0.92 (s, 3H), 0.91 (s, 3H), 0.74 (s, 3H), 0.72 (s, 3H).

**13C RMN** (150 MHz, CDCl3) δ (ppm): 9.12, 9.30, 13.86, 18.17, 19.22, 21.79, 23.52, 23.55, 26.48, 26.60, 27.67, 28.10, 29.11, 29.17, 29.78, 30.13, 31.25, 31.27, 32.23, 33.19, 35.03, 36.22, 36.69, 37.11, 37.80, 41.64, 41.72, 42.51, 42.75, 56.32, 56.40, 56.82, 56.96, 66.35, 66.46, 67.63, 67.65, 68.05, 68.09, 68.26, 69.51, 72.54, 72.67, 76.69, 76.73, 82.19, 82.55, 86.64, 95.40, 98.23, 98.29, 113.78, 114.02, 114.87, 114.97, 120.38, 120.43, 129.96, 129.99, 133.48, 133.69, 146.61, 146.81, 159.52, 159.55, 168.67, 168.87, 199.94, 200.14, 204.06, 204.17.

**HRMS** m/z calculated for C52H76O15 [M+Na]+: 963.5076, found 963.5094.

**ESI MS low resolution** m/z calculated for C52H76O15 [M-H]-: 939.51, found 939.5037; m/z calculated for C52H76O15 [M-Cl]-: 975.49, found 975.72.

**3. 1H, 13C and DEPT-135 NMR spectra of BD-8**

**4. High resolution mass spectra of BD-8**

**5. ESI-MS low resolution of BD-8**
